# Supplementary material for: A Randomized Controlled Trial on the Effect of Needle Gauge on the Pain and Anxiety Experienced during Radial Arterial Puncture
Source: PubMed Central journal article supplement (PMC4583403; doi:10.1371/journal.pone.0139432), 2015-09-25
Supplement: pone.0139432.s002.pdf [file pone.0139432.s002.pdf]

| Number | Date        | Nurse | Arm | First ABG | Weight | Height | BMI  | Gender | Age | Right wrist diameter | left wrist diameter | Pulse quality | Duration ABG | Nb attempts | Reason of failure | Anxiety prior ABG | Pain after ABG | Anxiety after ABG | Médecin | Most painful moment | Nb of anterior ABG | Délaidermier GdS | Main respiratory disease | Smoking history | Pack-Year | Dyslipidemia | High blood pressure | Diabetes |
|--------|-------------|-------|-----|-----------|--------|--------|------|--------|-----|----------------------|---------------------|---------------|--------------|-------------|-------------------|-------------------|----------------|-------------------|---------|---------------------|--------------------|------------------|--------------------------|-----------------|-----------|--------------|---------------------|----------|
| 1      | 11-avr-2013 | 1     | 2   | 0         | 187    | 1,72   | 63,2 | 1      |     | 61,21,5              | NA                  |               | 3            | 42          | 1 NA              | 1                 | 2              | 3 DB              |         | 2                   | 11                 |                  | 1                        | 150             | 1         | 1            | 1                   |          |
| 2      | 11-avr-2013 | 1     | 2   | 0         | 60     | 1,70   | 20,8 | 1      |     | 83                   | 19                  | NA            | 0            | 33          | 1 NA              | 0                 | 0              | 0 PP              |         | 4                   | 10                 |                  | 1                        | 170             | 0         | 0            | 0                   |          |
| 3      | 11-avr-2013 | 1     | 1   | 0         | 96     | 1,65   | 35,3 | 1      |     | 76                   | NA                  | 20            | 2            | 25          | 1 NA              | 5                 | 8              | 0 FP              |         | 0                   | 12                 |                  | 1                        | 110             | 0         | 1            | 0                   |          |
| 4      | 11-avr-2013 | 2     | 1   | 0         | 97     | 1,66   | 35,2 | 0      |     | 51                   | 19                  | NA            | 1            | 19          | 1 NA              | 1                 | 0              | 0 DB              |         | 0                   | 10                 |                  | 5                        | 1 NA            | 0         | 1            | 0                   |          |
| 5      | 11-avr-2013 | 1     | 1   | 0         | 48     | 1,64   | 17,8 | 1      |     | 64                   | NA                  | 16            | 4            | 22          | 1 NA              | 1                 | 4              | 0 DP              |         | 4                   | 10                 |                  | 5                        | 1               | 0         | 1            | 0                   |          |
| 6      | 11-avr-2013 | 5     | 1   | 0         | 104    | 1,57   | 42,2 | 0      |     | 70                   | 20                  | NA            | 3            | 37          | 1 NA              | 53                | 13             | 15 CV             |         | 0                   | 10                 |                  | 3                        | 1 NA            | 1         | 1            | 0                   |          |
| 7      | 11-avr-2013 | 2     | 2   | 0         | 55     | 1,60   | 21,5 | 0      |     | 77                   | 17,7                | NA            | 2            | 46          | 1 NA              | 13                | 11             | 0 DP              |         | 1                   | 12                 |                  | 1                        | 1               | 1         | 1            | 0                   |          |
| 8      | 11-avr-2013 | 2     | 2   | 0         | 119    | 1,62   | 45,3 | 0      |     | 60                   | 19,5                | NA            | 1            | 28          | 1 NA              | 97                | 77             | 96 CV             |         | 1                   | 12                 |                  | 3                        | 10              | 1         | 1            | 1                   |          |
| 9      | 11-avr-2013 | 1     | 2   | 0         | 74     | 1,64   | 27,5 | 0      |     | 64                   | NA                  | 17,9          | 1            | 33          | 1 NA              | 0                 | 4              | 0 DP              |         | 2                   | 10                 |                  | 2                        | 1 NA            | 0         | 0            | 0                   |          |
| 10     | 11-avr-2013 | 1     | 1   | 0         | 112    | 1,80   | 34,6 | 1      |     | 68                   | NA                  | 19            | 1            | 48          | 1 NA              | 5                 | 5              | 0 CV              |         | 1                   | 10                 |                  | 1                        | 1               | 0         | 1            | 1                   |          |
| 11     | 12-avr-2013 | 5     | 1   | 0         | 123    | 1,77   | 39,3 | 1      |     | 79                   | NA                  | 21,3          | 2            | 27          | 1 NA              | 49                | 48             | 0 CV              |         | 0                   | 10                 |                  | 3                        | 1 NA            | 0         | 1            | 0                   |          |
| 12     | 12-avr-2013 | 5     | 2   | 0         | 69     | 1,80   | 21,3 | 1      |     | 51                   | NA                  | 17            | 1            | 40          | 1 NA              | 100               | 26             | 0 CV              |         | 0                   | 10                 |                  | 1                        | 130             | 0         | 0            | 0                   |          |
| 13     | 12-avr-2013 | 5     | 2   | 0         | 82     | 1,61   | 31,6 | 0      |     | 74                   | NA                  | 20            | 2            | 50          | 1 NA              | 91                | 77             | 86 DS             |         | 0                   | 10                 |                  | 1                        | 140             | 0         | 1            | 1                   |          |
| 14     | 12-avr-2013 | 5     | 1   | 0         | 86     | 1,80   | 26,5 | 1      |     | 40                   | NA                  | 18,5          | 1            | 0           | 1 NA              | 0                 | 0              | 0 HA              |         | 0                   | 12                 |                  | 0                        | 0               | 17        | 1            | 0                   |          |
| 15     | 12-avr-2013 | 4     | 1   | 0         | 80     | 1,81   | 24,4 | 1      |     | 75                   | 20                  | NA            | 3            | 35          | 1 NA              | 10                | 13             | 8 LCMV            |         | 2                   | 12                 |                  | 5                        | 15              | 0         | 0            | 0                   |          |
| 16     | 15-avr-2013 | 3     | 2   | 0         | 95     | 1,63   | 35,8 | 1      |     | 80                   | NA                  | 18            | 3            | 30          | 1 NA              | 17                | 7              | 5 DS              |         | 0                   | 10                 |                  | 4                        | 160             | 1         | 1            | 0                   |          |
| 17     | 16-avr-2013 | 3     | 2   | 0         | 85     | 1,80   | 26,2 | 1      |     | 53                   | 17,5                | 17            | 2            | 68          | 2                 | 0                 | 45             | 2 LCMV            |         | 2                   | 12                 |                  | 5                        | 0               | 40        | 0            | 0                   |          |
| 18     | 16-avr-2013 | 3     | 2   | 1         | 84     | 1,70   | 29,1 | 1      |     | 65                   | 20                  | NA            | 2            | 30          | 1 NA              | 0                 | 4              | 4 JFM             |         | 1                   | 0 NA               |                  | 3                        | 15              | 1         | 1            | 0                   |          |
| 19     | 16-avr-2013 | 3     | 2   | 0         | 95     | 1,62   | 36,2 | 0      |     | 58                   | 17                  | 0             | 1            | 54          | 1 NA              | 54                | 1              | 7 LCMV            |         | 4                   | 10                 |                  | 5                        | 1 NA            | 1         | 1            | 0                   |          |
| 20     | 17-avr-2013 | 3     | 1   | 0         | 79     | 1,71   | 27,0 | 1      |     | 71                   | 17,5                | NA            | 2            | 120         | 1 NA              | 7                 | 7              | 0 DB              |         | 2                   | 10                 |                  | 1                        | 1               | 0         | 1            | 0                   |          |
| 21     | 17-avr-2013 | 3     | 2   | 0         | 51     | 1,72   | 17,2 | 1      |     | 78                   | NA                  | 16            | 4            | 40          | 1 NA              | 100               | 1              | 46 DB             |         | 2                   | 10                 |                  | 1                        | 1100            | 0         | 0            | 0                   |          |
| 22     | 17-avr-2013 | 3     | 1   | 0         | 91     | 1,70   | 31,5 | 1      |     | 61                   | 17,5                | NA            | 2            | 100         | 1 NA              | 10                | 15             | 11 DB             |         | 0                   | 11                 |                  | 1                        | 145             | 0         | 0            | 0                   |          |
| 23     | 17-avr-2013 | 2     | 1   | 0         | 63     | 1,76   | 20,3 | 1      |     | 75                   | 17,5                | NA            | 1            | 72          | 1 NA              | 72                | 2              | 17 DB             |         | 0                   | 10                 |                  | 1                        | 1 NA            | 0         | 0            | 0                   |          |
| 24     | 17-avr-2013 | 2     | 1   | 0         | 89     | 1,82   | 29,9 | 1      |     | 56                   | 19,3                | NA            | 3            | 28          | 1 NA              | 0                 | 0              | 0 DB              |         | 0                   | 0 NA               |                  | 1                        | 180             | 0         | 0            | 0                   |          |
| 25     | 18-avr-2013 | 3     | 2   | 0         | 89     | 1,68   | 31,5 | 1      |     | 81                   | 18                  | NA            | 1            | 50          | 1 NA              | 0                 | 0              | 0 FP              |         | 4                   | 12                 |                  | 4                        | 117             | 1         | 1            | 1                   |          |
| 26     | 18-avr-2013 | 3     | 2   | 0         | 70     | 1,69   | 24,5 | 1      |     | 82                   | 17                  | NA            | 1            | 60          | 1 NA              | 71                | 13             | 79 FP             |         | 0                   | 10                 |                  | 5                        | 1 NA            | 1         | 1            | 0                   |          |
| 27     | 18-avr-2013 | 3     | 1   | 1         | 92     | 1,80   | 28,4 | 1      |     | 70                   | 18                  | NA            | 2            | 120         | 1 NA              | 0                 | 19             | 0 DB              |         | 1                   | 0 NA               |                  | 5                        | 120             | 1         | 1            | 0                   |          |
| 28     | 18-avr-2013 | 3     | 2   | 0         | 65     | 1,54   | 27,4 | 0      |     | 71                   | NA                  | 15,5          | 1            | 48          | 1 NA              | 0                 | 12             | 2 DP              |         | 0                   | 10                 |                  | 1                        | 1               | 0         | 0            | 0                   |          |
| 29     | 18-avr-2013 | 5     | 2   | 0         | 94     | 1,70   | 32,5 | 1      |     | 59                   | 20                  | NA            | 2            | 41          | 1 NA              | 12                | 0              | 0 DP              |         | 1                   | 10                 |                  | 1                        | 1               | 0         | 0            | 0                   |          |
| 30     | 19-avr-2013 | 2     | 1   | 0         | 97     | 1,56   | 39,9 | 0      |     | 60                   | NA                  | 18            | 2            | 52          | 1 NA              | 0                 | 0              | 0 CV              |         | 0                   | 10                 |                  | 4                        | 1 NA            | 0         | 1            | 1                   |          |
| 31     | 19-avr-2013 | 2     | 1   | 0         | 122    | 1,80   | 42,2 | 0      |     | 63                   | NA                  | 20,5          | 0            | 33          | 1 NA              | 0                 | 0              | 0 LCMV            |         | 4                   | 10                 |                  | 2                        | 16              | 0         | 0            | 0                   |          |
| 32     | 19-avr-2013 | 5     | 1   | 0         | 95     | 1,62   | 28,7 | 1      |     | 69                   | NA                  | 20,3          | 2            | 35          | 1 NA              | 50                | 53             | 8 HA              |         | 0                   | 11                 |                  | 3                        | 1               | 0         | 1            | 0                   |          |
| 33     | 19-avr-2013 | 5     | 1   | 0         | 67     | 1,58   | 26,8 | 0      |     | 61                   | 16                  | NA            | 3            | 25          | 1 NA              | 5                 | 2              | 0 HA              |         | 0                   | 12                 |                  | 3                        | 1 NA            | 1         | 0            | 1                   |          |
| 34     | 19-avr-2013 | 4     | 1   | 0         | 92     | 1,67   | 33,0 | 1      |     | 79                   | 18                  | NA            | 3            | 14          | 1 NA              | 46                | 0              | 0 JFM             |         | 3                   | 12                 |                  | 3                        | 1 NA            | 1         | 1            | 1                   |          |
| 35     | 19-avr-2013 | 5     | 2   | 0         | 92     | 1,64   | 34,2 | 0      |     | 47                   | NA                  | 17            | 2            | 40          | 1 NA              | 83                | 13             | 83 HA             |         | 0                   | 10                 |                  | 5                        | 0               | 41        | 0            | 0                   | 0        |
| 36     | 19-avr-2013 | 2     | 2   | 0         | 88     | 1,69   | 30,8 | 1      |     | 48                   | NA                  | 17,7          | 3            | 34          | 1 NA              | 0                 | 5              | 0 JFM             |         | 0                   | 12                 |                  | 3                        | 1 NA            | 0         | 1            | 0                   |          |
| 37     | 19-avr-2013 | 2     | 1   | 0         | 78     | 1,60   | 30,5 | 1      |     | 83                   | 16,8                | NA            | 2            | 30          | 1 NA              | 0                 | 0              | 0 LCMV            |         | 4                   | 11                 |                  | 3                        | 1 NA            | 0         | 0            | 0                   |          |
| 38     | 19-avr-2013 | 5     | 1   | 0         | 85     | 1,62   | 32,4 | 1      |     | 98                   | 0                   | NA            | 4            | 15          | 1 NA              | 0                 | 2              | 1 LCMV            |         | 4                   | 12                 |                  | 1                        | 1               | 0         | 0            | 0                   |          |
| 39     | 19-avr-2013 | 5     | 2   | 1         | 80     | 1,60   | 31,3 | 0      |     | 60                   | 16,5                | NA            | 2            | 15          | 1 NA              | 50                | 0              | 14 HA             |         | 4                   | 0 NA               |                  | 3                        | 1 NA            | 0         | 0            | 0                   |          |
| 40     | 19-avr-2013 | 4     | 2   | 0         | 58     | 1,60   | 22,6 | 0      |     | 70                   | 16,5                | NA            | 3            | 58          | 1 NA              | 2                 | 0              | 0 JFM             |         | 0                   | 10                 |                  | 2                        | 1 NA            | 0         | 0            | 0                   |          |
| 41     | 19-avr-2013 | 2     | 1   | 0         | 108    | 1,61   | 41,7 | 0      |     | 64                   | NA                  | 18,3          | 3            | 16          | 1 NA              | 0                 | 0              | 0 JFM             |         | 0                   | 0 NA               |                  | 5                        | 1 NA            | 0         | 0            | 0                   |          |
| 42     | 19-avr-2013 | 4     | 2   | 0         | 83     | 1,63   | 31,2 | 0      |     | 89                   | 16,5                | NA            | 3            | 66          | 1 NA              | 7                 | 3              | 0 JFM             |         | 0                   | 12                 |                  | 5                        | 1 NA            | 1         | 1            | 0                   |          |
| 43     | 19-avr-2013 | 5     | 2   | 1         | 57     | 1,72   | 19,3 | 0      |     | 52                   | 17,5                | NA            | 2            | 35          | 1 NA              | 0                 | 7              | 0 JFM             |         | 4                   | 0 NA               |                  | 2                        | 1 NA            | 0         | 0            | 0                   |          |
| 44     | 19-avr-2013 | 4     | 2   | 1         | 130    | 1,68   | 46,1 | 0      |     | 68                   | NA                  | 18            | 2            | 50          | 1 NA              | 48                | 14             | 17 JFM            |         | 0                   | 0 NA               |                  | 5                        | 0               | 0         | 0            | 0                   |          |
| 45     | 19-avr-2013 | 5     | 1   | 0         | 57     | 1,56   | 23,4 | 0      |     | 38                   | 15                  | NA            | 2            | 25          | 1 NA              | 0                 | 5              | 1 JFM             |         | 0                   | 12                 |                  | 2                        | 1 NA            | 0         | 0            | 0                   |          |
| 46     | 22-avr-2013 | 1     | 1   | 1         | 89     | 1,75   | 29,1 | 1      |     | 63                   | 19                  | NA            | 1            | 110         | 2                 | 0                 | 16             | 21 PP             |         | 1                   | 0 NA               |                  | 1                        | 0               | 0         | 0            | 0                   |          |
| 47     | 22-avr-2013 | 4     | 2   | 0         | 58     | 1,50   | 25,8 | 0      |     | 92                   | 15                  | NA            | 3            | 55          | 1 NA              | 7                 | 30             | 4 PP              |         | 0                   | 10                 |                  | 1                        | #NULL!          | #NULL!    | #NULL!       | #NULL!              |          |
| 48     | 22-avr-2013 | 1     | 1   | 1         | 84     | 1,76   | 27,1 | 0      |     | 67                   | NA                  | 18            | 1            | 40          | 1 NA              | 1                 | 17             | 10 PP             |         | 0                   | 0 NA               |                  | 1                        | 110             | 0         | 0            | 0                   |          |
| 49     | 22-avr-2013 | 4     | 1   | 0         | 60     | 1,60   | 23,4 | 0      |     | 77                   | NA                  | 15            | 3            | 49          | 1 NA              | 4                 | 0              | 0 AC              |         | 4                   | 10                 |                  | 5                        | 1 NA            | 0         | 1            | 0                   |          |
| 50     | 22-avr-2013 | 1     | 1   | 0         | 50     | 1,75   | 30,4 | 0      |     | 54                   | 16                  | NA            | 0            | 34          | 1 NA              | 29                | 44             | 44 AC             |         | 0                   | 10                 |                  | 1                        | 0               | 0         | 0            | 0                   |          |
| 51     | 23-avr-2013 | 1     | 1   | 2         | 132    | 1,52   | 57,1 | 0      |     | 61                   | 23                  | NA            | 2            | 60          | 1 NA              | 4                 | 24             | 0 FP              |         | 0                   | 10                 |                  | 4                        | 1 NA            | 1         | 1            | 1                   |          |
| 52     | 23-avr-2013 | 1     | 1   | 0         | 95     | 1,58   | 38,1 | 0      |     | 82                   | NA                  | 22            | 1            | 34          | 1 NA              | 0                 | 1              | 2                 | 0 LCMV  |                     | 4                  | 10               |                          | 4               | 1 NA      | 0            | 1                   | 0        |
| 53     | 23-avr-2013 | 4     | 2   | 0         | 82     | 1,83   | 24,5 | 1      |     | 71                   | 17                  | NA            | 2            | 65          | 1 NA              | 12                | 5              | 7 BL              |         | 2                   | #NULL!             |                  | 1                        | 0               | 18        | 0            | 0                   | 0        |
| 54     | 24-avr-2013 | 4     | 1   | 0         | 137    | 1,72   | 46,3 | 1      |     | 38                   | 19                  | NA            | 2            | 47          | 1 NA              | 9                 | 0              | 0 JFM             |         | 4                   | 12                 |                  | 3                        | 1 NA            | 1         | 0            | 1                   |          |
| 55     | 24-avr-2013 | 4     | 2   | 0         | 70     | 1,68   | 24,8 | 0      |     | 76                   | NA                  | 17            | 4            | 36          | 1 NA              | 2                 | 2              | 0 JFM             |         | 0                   | 12                 |                  | 1                        | 1               | 1         | 1            | 0                   |          |
| 56     | 24-avr-2013 | 3     | 2   | 1         | 62     | 1,60   | 24,2 | 0      |     | 56                   | NA                  | 16            | 2            | 70          | 1 NA              | 0                 | 0              | 0 JFM             |         | 4                   | 0 NA               |                  | 5                        | 1 NA            | 1         | 1            | 0                   |          |
| 57     | 24-avr-2013 | 4     | 1   | 0         | 76     | 1,69   | 26,6 | 0      |     | 62                   | 18                  | NA            | 2            | 32          | 1 NA              | 5                 | 0              | 0 JFM             |         | 0                   | 10                 |                  | 1                        | 150             | 0         | 0            | 0                   |          |
| 58     | 24-avr-2013 | 3     | 1   | 1         | 69     | 1,63   | 25,3 | 0      |     | 60                   | NA                  | 20,5          | 1            | 50          | 1 NA              | 0                 | 2              | 1 JFM             |         | 0                   | 0 NA               |                  | 5                        | 0               | 1         | 1            | 0                   |          |
| 59     | 24-avr-2013 | 3     | 2   | 0         | 111    | 1,62   | 24,6 | 2      |     | 63                   | NA                  | 17            | 2            | 59          | 1 NA              | 0                 | 0              | 0 JFM             |         | 0                   | 10                 |                  | 3                        | 67              | 1         | 1            | 0                   |          |
| 60     | 24-avr-2013 | 4     | 1   | 0         | 102    | 1,63   | 38,4 | 0      |     | 59                   | NA                  | 19            | 2            | 50          | 1 NA              | 71                | 0              | #NULL!            |         | 2                   | 0 NA               |                  | 3                        | 1               | 1         | 1            | 0                   |          |
| 61     | 24-avr-2013 | 1     | 2   | 0         | 76     | 1,64   | 28,3 | 0      |     | 61                   | NA                  | 19            | 1            | 70          | 1 NA              | 0                 | 0              | 0 JFM             |         | 1                   | 0 NA               |                  | 3                        | 1 NA            | 0         | 1            | 0                   |          |
| 62     | 24-avr-2013 | 3     | 2   | 0         | 85     | 1,71   | 29,1 | 1      |     | 77                   | NA                  | 19            | 2            | 42          | 1 NA              | 27                | 0              | 0 JFM             |         | 4                   | 1                  |                  | 3                        | 1 NA            | 0         | 1            | 0                   |          |
| 63     | 24-avr-2013 | 4     | 1   | 0         | 104    | 1,75   | 34,0 | 1      |     | 72                   | NA                  | 19            | 2            | 48          | 1 NA              | 2                 | 0              | 1 JFM             |         | 4                   | 12                 |                  |                          |                 |           |              |                     |          |

|     |             |   |   |   |     |      |      |   |    |      |      |    |     |    |    |     |    |      |      |      |     |    |     |    |     |    |   |   |     |   |
|-----|-------------|---|---|---|-----|------|------|---|----|------|------|----|-----|----|----|-----|----|------|------|------|-----|----|-----|----|-----|----|---|---|-----|---|
| 103 | 29-avr-2013 | 1 | 1 | 0 | 56  | 1,76 | 18,1 | 1 | 81 | 16,5 | NA   | 1  | 25  | 1  | NA | 14  | 2  | 1    | PP   | 0    | 0   | 1  | 1   | 1  | 0   | 1  | 1 | 0 |     |   |
| 104 | 30-avr-2013 | 1 | 2 | 0 | 76  | 1,67 | 27,3 | 0 | 76 |      | 1    | 85 | 1   | NA | 13 | 0   | 0  | LCMV | 0    | 0    | 13  | 5  | 0   | 15 | 1   | 1  | 1 | 0 |     |   |
| 105 | 30-avr-2013 | 2 | 1 | 0 | 123 | 1,76 | 39,7 | 0 | 71 | 20   | NA   | 2  | 29  | 1  | NA | 0   | 3  | 0    | LCMV | 0    | 10  | 4  | 120 | 1  | 1   | 1  | 0 | 0 |     |   |
| 106 | 30-avr-2013 | 2 | 2 | 0 | 185 | 1,72 | 62,5 | 0 | 30 | 22,3 | NA   | 1  | 33  | 1  | NA | 0   | 0  | 1    | JFM  | 4    | 11  | 3  | 1   | NA | 0   | 1  | 0 | 0 |     |   |
| 107 | 30-avr-2013 | 1 | 1 | 0 | 90  | 1,83 | 26,9 | 0 | 68 | 17   | 17,5 | 1  | 108 | 2  |    | 25  | 14 | 0    | 0    | JFM  | 3   | 11 | 3   | 1  |     | 0  | 1 | 0 |     |   |
| 108 | 14-mai-2013 | 3 | 2 | 0 | 45  | 1,60 | 17,6 | 1 | 81 | 14   | NA   | 2  | 53  | 1  | NA | 51  | 13 | 0    | 25   | LCMV | 0   | 10 | 5   | 1  | 1   | 0  | 1 | 0 |     |   |
| 109 | 14-mai-2013 | 1 | 1 | 1 | 70  | 1,80 | 21,6 | 1 | 91 | 18   | NA   | 2  | 65  | 1  | NA | 4   | 0  | 0    | 20   | LCMV | 0   | 10 | 5   | 1  |     | 1  | 1 | 0 |     |   |
| 110 | 13-mai-2013 | 1 | 1 | 0 | 104 | 1,70 | 36,0 | 1 | 56 | NA   | 1    | 2  | 27  | 1  | NA | 9   | 23 | 0    | 0    | AC   | 1   | 10 | 5   | 1  |     | 0  | 1 | 0 |     |   |
| 111 | 13-mai-2013 | 3 | 1 | 0 | 85  | 1,65 | 20,2 | 1 | 75 | NA   | 17   | 1  | 90  | 1  | NA | 9   | 6  | 0    | 0    | AC   | 0   | 0  | NA  | 5  | 1   | 0  | 0 | 0 |     |   |
| 112 | 14-mai-2013 | 1 | 1 | 0 | 82  | 1,82 | 24,8 | 1 | 65 | 18,5 | NA   | 2  | 27  | 1  | NA | 18  | 18 | 0    | 7    | BL   | 0   | 11 | 5   | 1  | NA  | 0  | 0 | 0 |     |   |
| 113 | 14-mai-2013 | 3 | 2 | 0 | 70  | 1,72 | 23,7 | 0 | 67 | 17   | NA   | 1  | 80  | 1  | NA | 0   | 0  | 0    | 43   | 5    | BL  | 0  | 10  | 1  | 1   | 1  | 0 | 0 |     |   |
| 114 | 14-mai-2013 | 3 | 2 | 0 | 58  | 1,50 | 25,8 | 0 | 79 | 15,5 | NA   | 1  | 45  | 1  | NA | 33  | 82 | 0    | 0    | BL   | 0   | 11 | 5   | 1  | NA  | 0  | 1 | 0 |     |   |
| 115 | 14-mai-2013 | 3 | 1 | 0 | 97  | 1,78 | 30,6 | 1 | 78 | 18   | NA   | 2  | 22  | 1  | NA | 0   | 0  | 0    | 16   | BL   | 4   | 10 | 4   | 1  | NA  | 1  | 0 | 0 |     |   |
| 116 | 14-mai-2013 | 3 | 1 | 0 | 82  | 1,57 | 33,3 | 0 | 55 | NA   | 18   | 1  | 180 | 1  | NA | 96  | 23 | 0    | 100  | BL   | 0   | 12 | 4   | 0  | 60  | 1  | 1 | 1 |     |   |
| 117 | 14-mai-2013 | 1 | 2 | 0 | 58  | 1,62 | 22,1 | 1 | 70 | 17,5 | NA   | 2  | 97  | 1  | NA | 27  | 28 | 0    | 0    | BL   | 0   | 10 | 1   | 1  |     | 0  | 1 | 1 |     |   |
| 118 | 14-mai-2013 | 3 | 1 | 0 | 129 | 1,77 | 41,2 | 1 | 69 | 21   | 0    | 3  | 50  | 1  | NA | 0   | 0  | 0    | 0    | BL   | 4   | 12 | 3   | 1  | 150 | 1  | 1 | 1 |     |   |
| 119 | 14-mai-2013 | 1 | 2 | 0 | 61  | 1,55 | 25,4 | 0 | 77 | NA   | 15   | 2  | 38  | 1  | NA | 20  | 13 | 0    | 0    | AC   | 1   | 10 | 5   | 1  |     | 0  | 1 | 0 |     |   |
| 120 | 14-mai-2013 | 1 | 2 | 0 | 80  | 1,65 | 29,4 | 1 | 81 | NA   | 17,5 | 1  | 55  | 1  | NA | 4   | 4  | 14   | 5    | PP   | 0   | 10 | 5   | 1  | NA  | 0  | 1 | 0 |     |   |
| 121 | 15-mai-2013 | 5 | 1 | 0 | 65  | 1,68 | 23,0 | 1 | 62 | NA   | 17   | 2  | 15  | 1  | NA | 63  | 63 | 0    | 21   | JFM  | 0   | 11 | 1   | 1  |     | 1  | 0 | 0 |     |   |
| 122 | 15-mai-2013 | 5 | 2 | 1 | 109 | 1,82 | 32,9 | 1 | 54 | NA   | 21   | 2  | 11  | 1  | NA | 11  | 1  | 0    | 0    | JFM  | 4   | 0  | NA  | 3  | 0   | 20 | 1 | 0 | 0   |   |
| 123 | 15-mai-2013 | 3 | 1 | 1 | 80  | 1,76 | 25,8 | 1 | 52 | 16,5 | NA   | 2  | 43  | 1  | NA | 0   | 58 | 0    | 7    | JFM  | 0   | 0  | NA  | 3  | 1   |    | 0 | 1 | 0   |   |
| 124 | 15-mai-2013 | 5 | 1 | 0 | 124 | 1,88 | 35,1 | 1 | 46 | NA   | 21   | 0  | 22  | 1  | NA | 0   | 2  | 0    | 0    | JFM  | 0   | 11 | 5   | 1  | 130 | 0  | 1 | 0 | 0   |   |
| 125 | 15-mai-2013 | 3 | 2 | 0 | 77  | 1,58 | 30,8 | 0 | 44 | NA   | 16   | 1  | 50  | 1  | NA | 0   | 26 | 2    | 2    | JFM  | 2   | 11 | 5   | 0  | 25  | 0  | 0 | 0 | 0   |   |
| 126 | 15-mai-2013 | 3 | 2 | 0 | 98  | 1,67 | 35,1 | 1 | 67 | NA   | 19,5 | 1  | 35  | 1  | NA | 9   | 4  | 0    | 2    | JFM  | 4   | 10 | 3   | 1  | NA  | 0  | 0 | 0 | 0   |   |
| 127 | 15-mai-2013 | 5 | 2 | 0 | 138 | 1,73 | 46,1 | 1 | 67 | NA   | 21   | 0  | 2   | 27 | 1  | NA  | 0  | 0    | 0    | 0    | JFM | 4  | 10  | 4  | 1   | NA | 1 | 1 | 1   | 0 |
| 128 | 15-mai-2013 | 3 | 1 | 0 | 94  | 1,54 | 39,6 | 0 | 74 | NA   | 17   | 0  | 160 | 0  | NA | 22  | 0  | 0    | 0    | JFM  | 3   | 12 | 3   | 1  | NA  | 1  | 1 | 1 | 0   |   |
| 129 | 15-mai-2013 | 3 | 1 | 0 | 105 | 1,68 | 37,2 | 0 | 39 | 19   | NA   | 0  | 140 | 0  | NA | 0   | 10 | 0    | 0    | JFM  | 4   | 11 | 2   | 1  | NA  | 0  | 0 | 1 | 0   |   |
| 130 | 15-mai-2013 | 5 | 1 | 0 | 89  | 1,67 | 31,9 | 0 | 67 | NA   | 17   | 1  | 58  | 1  | NA | 0   | 0  | 0    | 0    | JFM  | 0   | 11 | 3   | 1  | NA  | 0  | 0 | 0 | 0   |   |
| 131 | 15-mai-2013 | 3 | 2 | 0 | 71  | 1,67 | 25,5 | 1 | 66 | NA   | 17   | 2  | 44  | 1  | NA | 0   | 0  | 0    | 0    | JFM  | 0   | 11 | 5   | 1  | 140 | 0  | 0 | 0 | 0   |   |
| 132 | 15-mai-2013 | 3 | 1 | 0 | 34  | 1,50 | 15,1 | 0 | 53 | NA   | 12,5 | 1  | 300 | 2  | 2  | 0   | 13 | 0    | 10   | LCMV | 0   | 10 | 1   | 1  | 140 | 0  | 0 | 0 | 0   |   |
| 133 | 15-mai-2013 | 5 | 2 | 0 | 64  | 1,52 | 27,7 | 0 | 70 | NA   | 16   | 1  | 27  | 1  | NA | 0   | 2  | 0    | 2    | JFM  | 0   | 11 | 1   | 1  |     | 1  | 0 | 0 | 0   |   |
| 134 | 15-mai-2013 | 5 | 1 | 1 | 76  | 1,69 | 26,6 | 1 | 63 | 17   | NA   | 2  | 15  | 1  | NA | 15  | 22 | 0    | 21   | JFM  | 0   | 0  | NA  | 3  | 1   | NA | 1 | 1 | 0   |   |
| 135 | 15-mai-2013 | 1 | 2 | 0 | 97  | 1,58 | 38,9 | 0 | 59 | 19   | NA   | 1  | 35  | 1  | NA | 39  | 19 | 0    | 32   | JFM  | 0   | 12 | 3   | 1  |     | 1  | 1 | 0 | 0   |   |
| 136 | 15-mai-2013 | 1 | 1 | 0 | 79  | 1,55 | 32,9 | 1 | 78 | 18   | 17   | 1  | 115 | 2  | NA | 0   | 7  | 0    | 3    | JFM  | 3   | 11 | 3   | 1  |     | 1  | 1 | 0 | 0   |   |
| 137 | 15-mai-2013 | 5 | 2 | 0 | 75  | 1,69 | 26,3 | 1 | 68 | 17   | NA   | 3  | 7   | 1  | NA | 3   | 9  | 0    | 6    | JFM  | 0   | 11 | 5   | 1  |     | 0  | 1 | 0 | 0   |   |
| 138 | 15-mai-2013 | 3 | 1 | 0 | 84  | 1,76 | 27,2 | 1 | 60 | NA   | 17   | 1  | 19  | 1  | NA | 0   | 17 | 0    | 0    | JFM  | 3   | 12 | 0   | 1  |     | 1  | 1 | 0 | 0   |   |
| 139 | 15-mai-2013 | 3 | 2 | 0 | 80  | 1,71 | 27,4 | 1 | 70 | 18   | NA   | 3  | 40  | 1  | NA | 45  | 0  | 0    | 0    | JFM  | 4   | 10 | 5   | 1  |     | 1  | 1 | 1 | 0   |   |
| 140 | 15-mai-2013 | 5 | 2 | 0 | 92  | 1,62 | 35,1 | 0 | 63 | 20,5 | NA   | 1  | 25  | 1  | NA | 0   | 1  | 0    | 2    | JFM  | 4   | 11 | 3   | 1  | NA  | 0  | 1 | 0 | 0   |   |
| 141 | 15-mai-2013 | 1 | 1 | 0 | 75  | 1,58 | 30,0 | 0 | 83 | 18,5 | 18   | 2  | 80  | 2  | NA | 39  | 43 | 0    | 2    | JFM  | 3   | 11 | 3   | 1  |     | 0  | 1 | 0 | 0   |   |
| 142 | 15-mai-2013 | 5 | 2 | 1 | 119 | 1,62 | 45,3 | 0 | 25 | 17,5 | NA   | 2  | 40  | 1  | NA | 0   | 60 | 0    | 0    | JFM  | 2   | 0  | NA  | 5  | 1   | NA | 0 | 0 | 0   |   |
| 143 | 15-mai-2013 | 3 | 1 | 0 | 55  | 1,55 | 22,9 | 1 | 87 | 16   | NA   | 3  | 20  | 1  | NA | 1   | 5  | 0    | 1    | JFM  | 0   | 12 | 1   | 1  |     | 0  | 1 | 0 | 0   |   |
| 144 | 15-mai-2013 | 5 | 2 | 0 | 110 | 1,84 | 32,5 | 1 | 74 | NA   | 21   | 2  | 55  | 2  | 3  | 15  | 9  | 0    | 3    | JFM  | 3   | 12 | 3   | 1  | 140 | 0  | 1 | 0 | 0   |   |
| 145 | 15-mai-2013 | 1 | 2 | 0 | 79  | 1,59 | 31,2 | 0 | 63 | NA   | 18   | 2  | 34  | 1  | NA | 13  | 23 | 0    | 5    | JFM  | 0   | 11 | 5   | 1  | NA  | 0  | 1 | 0 | 0   |   |
| 146 | 15-mai-2013 | 5 | 1 | 0 | 61  | 1,47 | 28,2 | 0 | 60 | NA   | 16,5 | 0  | 21  | 1  | NA | 0   | 8  | 0    | 0    | JFM  | 0   | 11 | 5   | 1  | NA  | 0  | 1 | 0 | 0   |   |
| 147 | 15-mai-2013 | 1 | 2 | 0 | 118 | 1,61 | 45,5 | 0 | 27 | 17,5 | NA   | 0  | 5   | 1  | NA | 0   | 0  | 0    | 0    | JFM  | 5   | 0  | NA  | 5  | 1   | NA | 0 | 0 | 0   |   |
| 148 | 15-mai-2013 | 5 | 1 | 0 | 111 | 1,75 | 36,2 | 1 | 71 | NA   | 19   | 3  | 20  | 1  | NA | 0   | 38 | 0    | 1    | JFM  | 0   | 11 | 1   | 0  |     | 1  | 0 | 0 | 0   |   |
| 149 | 15-mai-2013 | 3 | 2 | 0 | 75  | 1,70 | 26,0 | 1 | 69 | 19   | NA   | 3  | 65  | 1  | NA | 0   | 0  | 0    | 0    | JFM  | 4   | 11 | 2   | 1  | 120 | 0  | 0 | 0 | 0   |   |
| 150 | 15-mai-2013 | 2 | 2 | 0 | 83  | 1,71 | 28,4 | 1 | 48 | 18,5 | NA   | 1  | 70  | 1  | NA | 6   | 48 | 0    | 1    | JFM  | 0   | 11 | 2   | 1  |     | 0  | 0 | 0 | 0   |   |
| 151 | 15-mai-2013 | 1 | 1 | 1 | 125 | 1,77 | 39,9 | 0 | 32 | NA   | 18   | 2  | 28  | 1  | NA | 30  | 10 | 0    | 0    | JFM  | 0   | 0  | NA  | 5  | 1   | NA | 0 | 0 | 0   |   |
| 152 | 15-mai-2013 | 3 | 1 | 0 | 65  | 1,55 | 27,1 | 0 | 66 | 15   | NA   | 1  | 105 | 1  | NA | 100 | 56 | 0    | 100  | JFM  | 0   | 11 | 2   | 1  | NA  | 0  | 1 | 0 | 0   |   |
| 153 | 15-mai-2013 | 5 | 1 | 0 | 117 | 1,78 | 36,9 | 1 | 56 | 21   | NA   | 2  | 11  | 1  | NA | 0   | 5  | 0    | 16   | JFM  | 0   | 10 | 1   | 0  |     | 1  | 0 | 1 | 0   |   |
| 154 | 16-mai-2013 | 3 | 2 | 0 | 36  | 1,58 | 14,4 | 0 | 81 | NA   | 14   | 1  | 60  | 1  | NA | 25  | 21 | 0    | 26   | PP   | 0   | 10 | 1   | 1  | NA  | 0  | 0 | 0 | 0   |   |
| 155 | 16-mai-2013 | 1 | 2 | 0 | 91  | 1,63 | 35,5 | 0 | 83 | NA   | 17   | 0  | 34  | 1  | NA | 0   | 10 | 0    | 17   | 6    | PP  | 0  | 10  | 5  | 1   | NA | 0 | 1 | 0   | 0 |
| 156 | 16-mai-2013 | 5 | 1 | 0 | 82  | 1,55 | 34,1 | 0 | 77 | NA   | 16   | 1  | 20  | 1  | NA | 8   | 3  | 0    | 5    | PP   | 0   | 10 | 5   | 1  |     | 0  | 1 | 0 | 0   |   |
| 157 | 16-mai-2013 | 1 | 2 | 0 | 79  | 1,78 | 24,9 | 1 | 70 | 17,5 | NA   | 2  | 42  | 1  | NA | 2   | 6  | 0    | 0    | DP   | 2   | 12 | 5   | 1  |     | 0  | 0 | 0 | 0   |   |
| 158 | 17-mai-2013 | 1 | 2 | 1 | 72  | 1,45 | 34,2 | 0 | 83 | NA   | 16   | 2  | 46  | 1  | NA | 19  | 1  | 0    | 0    | CV   | 4   | 0  | NA  | 2  | 1   | NA | 0 | 0 | 0   |   |
| 159 | 17-mai-2013 | 1 | 1 | 0 | 66  | 1,53 | 28,2 | 0 | 63 | NA   | 15   | 2  | 25  | 1  | NA | 13  | 52 | 0    | 7    | CV   | 0   | 10 | 2   | 1  | NA  | 0  | 0 | 0 | 0   |   |
| 160 | 16-mai-2013 | 5 | 1 | 1 | 130 | 1,80 | 40,1 | 1 | 53 | 21   | NA   | 0  | 35  | 1  | NA | 0   | 0  | 0    | 0    | DB   | 4   | 0  | NA  | 1  | 0   | 10 | 0 | 1 | 1   |   |
| 161 | 16-mai-2013 | 3 | 2 | 0 | 97  | 1,78 | 30,6 | 1 | 57 | NA   | 18   | 2  | 40  | 1  | NA | 0   | 2  | 0    | 2    | DB   | 4   | 11 | 3   | 1  | NA  | 0  | 1 | 1 | 0   |   |
| 162 | 16-mai-2013 | 5 | 1 | 0 | 70  | 1,72 | 23,7 | 1 | 78 | 17   | NA   | 2  | 11  | 1  | NA | 0   | 2  | 0    | 0    | DB   | 4   | 10 | 1   | 1  | 130 | 0  | 0 | 1 | 0</ |   |
